# Supplementary material
Source: PubMed Central journal article supplement (PMC6900284)
Supplement: EMS85051-supplement-Supplementary_Table_1.pdf [file EMS85051-supplement-Supplementary_Table_1.pdf]

## Cryo-EM data collection, refinement and validation statistics

---

|                                                  | CPSF-AAUAAA<br>(EMD-4225)<br>(PDB 6FBS) |
|--------------------------------------------------|-----------------------------------------|
| <b>Data collection and processing</b>            |                                         |
| Magnification                                    | 47259                                   |
| Voltage (kV)                                     | 300                                     |
| Electron exposure (e-/Å <sup>2</sup> )           | 80                                      |
| Defocus range (µm)                               | 1.0-2.2                                 |
| Pixel size (Å)                                   | 1.058                                   |
| Symmetry imposed                                 | C1                                      |
| Initial particle images (no.)                    | 263000                                  |
| Final particle images (no.)                      | 137000                                  |
| Map resolution (Å)                               | 3.1                                     |
| FSC threshold                                    | 0.143                                   |
| <b>Refinement</b>                                |                                         |
| Initial model used (PDB code)                    | 6F9N                                    |
| Model resolution (Å)                             | 3.1                                     |
| FSC threshold                                    | 0.143                                   |
| Map sharpening <i>B</i> factor (Å <sup>2</sup> ) | -94.21                                  |
| Model composition                                |                                         |
| Non-hydrogen atoms                               | 13421                                   |
| Protein residues                                 | 1631                                    |
| RNA residues                                     | 10                                      |
| <i>B</i> factors (Å <sup>2</sup> )               |                                         |
| Protein                                          | 37.17                                   |
| RNA                                              | 55.38                                   |
| R.m.s. deviations                                |                                         |
| Bond lengths (Å)                                 | 0.010                                   |
| Bond angles (°)                                  | 0.968                                   |
| Validation                                       |                                         |
| MolProbity score                                 | 2.15                                    |
| Clashscore                                       | 10.75                                   |
| Poor rotamers (%)                                | 0.00                                    |
| Ramachandran plot                                |                                         |
| Favored (%)                                      | 88.2                                    |
| Allowed (%)                                      | 11.8                                    |
| Disallowed (%)                                   | 0.00                                    |

---
